# Supplementary material for: Adolescent to adult health care transition for persons with intellectual and developmental disability: current barriers, next steps
Source: Frontiers journal article supplement (doi:10.3389/fped.2025.1486325), 2025-08-15
Supplement: Data_Sheet_1.pdf [file Data_Sheet_1.pdf]

| <b>Supplementary Table 1: Barriers to Effective Pediatric to Adult Health Care Transition for Persons with IDD</b> |                                                                                                                                                                                                                                                                                                                                                                                                     |                                                                                                                                                                                                                                                                                                                                                                                                                                                                                                                                                                                                                |
|--------------------------------------------------------------------------------------------------------------------|-----------------------------------------------------------------------------------------------------------------------------------------------------------------------------------------------------------------------------------------------------------------------------------------------------------------------------------------------------------------------------------------------------|----------------------------------------------------------------------------------------------------------------------------------------------------------------------------------------------------------------------------------------------------------------------------------------------------------------------------------------------------------------------------------------------------------------------------------------------------------------------------------------------------------------------------------------------------------------------------------------------------------------|
| Health Care Transition Constraints <sup>1</sup>                                                                    | Cause(s) <sup>1</sup>                                                                                                                                                                                                                                                                                                                                                                               | Possible Ways to Remediate <sup>1,2</sup>                                                                                                                                                                                                                                                                                                                                                                                                                                                                                                                                                                      |
| Inadequate availability of formal, structured pediatric to adult health care transition programs                   | <ul style="list-style-type: none"> <li>• Low prioritization of transition programs</li> <li>• Inadequate number of primary care and specialist clinicians with expertise or willingness to care for those with IDD</li> <li>• Inadequate number of providers with expertise to address the unique needs of youth/young adults</li> <li>• Inadequate remuneration for providers' services</li> </ul> | <ul style="list-style-type: none"> <li>• Integrate health care transition into routine primary, specialty and behavioral health care</li> <li>• Improve communication of the need for pediatric to adult transition programs</li> <li>• Increase programmatic investment</li> <li>• Increase the number of clinical providers</li> <li>• Improvement of all clinical curricula</li> <li>• Reform of clinical service reimbursement system</li> <li>• Region/country-specific legislation ensuring successful transfer of care</li> <li>• Further research on models/outcomes of transition programs</li> </ul> |
| Delayed entry in transition planning for patients/caregivers                                                       | <ul style="list-style-type: none"> <li>• Inadequate policy/function of transition programs</li> <li>• Variability of patients/caregivers in willingness to begin transfer</li> <li>• Variability between providers regarding age of transfer</li> </ul>                                                                                                                                             | <ul style="list-style-type: none"> <li>• Implement more and better programs</li> <li>• Standardized and enforced upper age for transfer of care by medical providers</li> </ul>                                                                                                                                                                                                                                                                                                                                                                                                                                |
| Emotionally difficult transition from pediatric care for patients/caregivers                                       | <ul style="list-style-type: none"> <li>• Absent transition programs</li> </ul>                                                                                                                                                                                                                                                                                                                      | <ul style="list-style-type: none"> <li>• Improve communication with family</li> </ul>                                                                                                                                                                                                                                                                                                                                                                                                                                                                                                                          |

|                                                                                                                                           |                                                                                                                                                                                                                             |                                                                                                                                                                                                                                                         |
|-------------------------------------------------------------------------------------------------------------------------------------------|-----------------------------------------------------------------------------------------------------------------------------------------------------------------------------------------------------------------------------|---------------------------------------------------------------------------------------------------------------------------------------------------------------------------------------------------------------------------------------------------------|
|                                                                                                                                           | <ul style="list-style-type: none"> <li>• Inadequate transition programs with disorganized communication among family and care team</li> <li>• Lack of specialized social work providers</li> </ul>                          | <ul style="list-style-type: none"> <li>• Implement more and better programs</li> <li>• Develop/utilize peer and caregiver supports</li> </ul>                                                                                                           |
| Inadequate number of primary care and/or specialist clinicians in the adult medical system with expertise in caring for those with IDD    | <ul style="list-style-type: none"> <li>• Inadequate teaching regarding IDD in medical and nursing schools, residencies and fellowships</li> </ul>                                                                           | <ul style="list-style-type: none"> <li>• Improve all clinical curricula</li> </ul>                                                                                                                                                                      |
| Difficulty accessing primary care and/or specialist clinicians in the adult medical system with willingness to care for patients with IDD | <ul style="list-style-type: none"> <li>• Ableism</li> <li>• Inadequate remuneration for services</li> </ul>                                                                                                                 | <ul style="list-style-type: none"> <li>• Increase learning re: IDD and disability-related matters</li> <li>• Reform of clinical service reimbursement system</li> </ul>                                                                                 |
| Difficulties for patients/caregivers in making appointments                                                                               | <ul style="list-style-type: none"> <li>• Ableism</li> <li>• Limited clinic resources</li> </ul>                                                                                                                             | <ul style="list-style-type: none"> <li>• Ensure accessibility scheduling processes (e.g., improve websites and phone systems)</li> <li>• Make online chats or live help via phone available</li> </ul>                                                  |
| Challenges for patients/caregivers regarding transportation to appointments                                                               | <ul style="list-style-type: none"> <li>• Ableism</li> <li>• Poverty/income inequality</li> <li>• Geographic locale</li> </ul>                                                                                               | <ul style="list-style-type: none"> <li>• Improve access to transportation services</li> <li>• Increased utilization of mobile clinical units, if available</li> <li>• Increased utilization of telemedicine, when appropriate</li> </ul>                |
| Difficulties in the transfer of medical information from pediatric to the adult medical practices                                         | <ul style="list-style-type: none"> <li>• Inadequate electronic forms and portals</li> <li>• Incompatible electronic communication systems</li> <li>• Lack of education for clinical providers on available tools</li> </ul> | <ul style="list-style-type: none"> <li>• Develop improved electronic forms/portals</li> <li>• Increase use of 'Care Everywhere' or similar tools</li> <li>• Create written medical transfer summaries that are provided to patients/families</li> </ul> |

|                                                                                                                              |                                                                                                                                                                                                                                          |                                                                                                                                                                                                                                                                                                                                                                  |
|------------------------------------------------------------------------------------------------------------------------------|------------------------------------------------------------------------------------------------------------------------------------------------------------------------------------------------------------------------------------------|------------------------------------------------------------------------------------------------------------------------------------------------------------------------------------------------------------------------------------------------------------------------------------------------------------------------------------------------------------------|
|                                                                                                                              | <ul style="list-style-type: none"> <li>• Insufficient time/reimbursement for discussion between pediatric clinicians and clinicians in the adult system</li> </ul>                                                                       | <ul style="list-style-type: none"> <li>• Use short, patient-centered ‘medical summary’ videos</li> <li>• Use short, patient-centered life interests/lived experiences videos</li> <li>• Reform the clinical service reimbursement system</li> <li>• Embed tools regarding health care transition in the EMR to prompt usage and track progress</li> </ul>        |
| Inadequate information about the transition process and related resources for patients/caregivers                            | <ul style="list-style-type: none"> <li>• Inadequate transition programs</li> </ul>                                                                                                                                                       | <ul style="list-style-type: none"> <li>• Develop paper- and web-based resources for patients/families</li> <li>• Create transition consult clinic to provide access to transition navigator</li> <li>• Consultation with Legal Aid or embedded legal representation and/or social work in transition planning</li> <li>• Utilization of peer supports</li> </ul> |
| Inequitable access for patients related to the physical design of clinical spaces                                            | <ul style="list-style-type: none"> <li>• Ableism</li> <li>• Limited institutional resources</li> </ul>                                                                                                                                   | <ul style="list-style-type: none"> <li>• Follow ADA requirements (at a minimum)</li> <li>• Subsidization for increasing accessible spaces</li> </ul>                                                                                                                                                                                                             |
| Insufficient information for clinicians in the adult medical system about the transfer process and care for persons with IDD | <ul style="list-style-type: none"> <li>• Inadequate transition program</li> <li>• Inadequate teaching in medical and nursing schools, residencies, fellowships</li> <li>• Absent or inadequate professional practice policies</li> </ul> | <ul style="list-style-type: none"> <li>• Improve transition readiness materials for clinicians</li> <li>• Improve clinical curricula</li> <li>• New or improved professional practice policies</li> </ul>                                                                                                                                                        |

|                                                                                                         |                                                                                                                                                                                                                                        |                                                                                                                                                                                                                                                                                                                                                                    |
|---------------------------------------------------------------------------------------------------------|----------------------------------------------------------------------------------------------------------------------------------------------------------------------------------------------------------------------------------------|--------------------------------------------------------------------------------------------------------------------------------------------------------------------------------------------------------------------------------------------------------------------------------------------------------------------------------------------------------------------|
| Variable self-advocacy skills of patients                                                               | <ul style="list-style-type: none"> <li>• Inadequate individualized transition plan</li> </ul>                                                                                                                                          | <ul style="list-style-type: none"> <li>• Improve transition program</li> <li>• Utilization of peer supports, when possible</li> <li>• Utilization of clinical psychologists or specialized social work providers</li> </ul>                                                                                                                                        |
| Inadequate duration of many appointments from patients'/caregivers'/clinical providers' perspectives    | <ul style="list-style-type: none"> <li>• Biased medical compensation practices (oriented to RVUs and productivity goals vs. medical education, preventive care, collaborative care, care for those with medical complexity)</li> </ul> | <ul style="list-style-type: none"> <li>• Improve receipt/review of patient/family information prior to clinic visits</li> <li>• Use of scribes (actual person or AI)</li> <li>• Extend clinic hours (evenings, weekends)</li> <li>• Improve collaboration with medical system administration</li> <li>• Reform of clinical service reimbursement system</li> </ul> |
| Competing family and work obligations faced by caregivers during the transition process                 | <ul style="list-style-type: none"> <li>• Excessive demands on caregivers</li> <li>• Inadequate provider availability</li> <li>• Scheduling conflicts between caregivers and needed services</li> <li>• Child care needs</li> </ul>     | <ul style="list-style-type: none"> <li>• Improved transition program with better navigation, coordination and services</li> <li>• Provide childcare</li> <li>• Adjust schedules of day programs to that of full-time workers</li> </ul>                                                                                                                            |
| Negative impacts on caregivers' health related to the demands of managing their children's health needs | <ul style="list-style-type: none"> <li>• Excessive demands on caregivers' time due to inadequate transition program</li> <li>• Inadequate time for self care</li> </ul>                                                                | <ul style="list-style-type: none"> <li>• Improved transition program with better navigation, coordination and services</li> <li>• Novel medical practice design to provide care to young adult and the adult caregiver(s) at the same visit</li> </ul>                                                                                                             |
| Challenges in handling issues relating to relinquishing or sharing                                      | <ul style="list-style-type: none"> <li>• Inadequate information for all parties</li> </ul>                                                                                                                                             | <ul style="list-style-type: none"> <li>• Increase resources (legal, social work, psychol.)</li> </ul>                                                                                                                                                                                                                                                              |

|                                                                                                                                           |                                                                                                                                                                                                       |                                                                                                                                                                                                                                              |
|-------------------------------------------------------------------------------------------------------------------------------------------|-------------------------------------------------------------------------------------------------------------------------------------------------------------------------------------------------------|----------------------------------------------------------------------------------------------------------------------------------------------------------------------------------------------------------------------------------------------|
| medical decision making with patients                                                                                                     | <ul style="list-style-type: none"> <li>• Inadequate time for quality discussions</li> <li>• Inadequate resources</li> </ul>                                                                           | <ul style="list-style-type: none"> <li>• Reform of clinical service reimbursement system</li> </ul>                                                                                                                                          |
| Difficulties in communication between pediatric clinicians and clinicians in the adult system                                             | <ul style="list-style-type: none"> <li>• Biased medical compensation practices</li> <li>• Inadequate time for quality discussions</li> <li>• Incompatible electronic communication systems</li> </ul> | <ul style="list-style-type: none"> <li>• Reform of clinical service reimbursement system</li> <li>• Increase allowance of time in clinical encounters</li> <li>• Increase utilization of ‘Care Everywhere’ or similar tools</li> </ul>       |
| Difficulties in communication between clinicians in the adult medical system                                                              | <ul style="list-style-type: none"> <li>• Biased medical compensation practices</li> <li>• Inadequate time</li> <li>• Incompatible electronic communication systems</li> </ul>                         | <ul style="list-style-type: none"> <li>• Reform of clinical service reimbursement system</li> <li>• Increase allowance of time for this purpose</li> <li>• Increase utilization of ‘Care Everywhere’ or similar tools</li> </ul>             |
| Inadequate or insufficient supplies or equipment for patients after transfer to the adult medical system                                  | <ul style="list-style-type: none"> <li>• Ableism</li> <li>• Limited clinic resources</li> <li>• Lack of clear transfer plan</li> </ul>                                                                | <ul style="list-style-type: none"> <li>• Follow ADA requirements (at a minimum)</li> <li>• Implementation of improved transition plan</li> </ul>                                                                                             |
| Inadequate assistance for patients/caregivers in navigating the health care transition process and in navigating the adult medical system | <ul style="list-style-type: none"> <li>• Inadequate ‘navigation’ support of the transition team</li> </ul>                                                                                            | <ul style="list-style-type: none"> <li>• Implement a navigator or navigation team</li> <li>• Utilization of peer/caregiver supports</li> </ul>                                                                                               |
| Financial challenges for patients/caregivers related to clinical care and related services                                                | <ul style="list-style-type: none"> <li>• Expensive medical care</li> </ul>                                                                                                                            | <ul style="list-style-type: none"> <li>• Health insurance reform, incl. more emphasis on preventive and continued care</li> <li>• Transition call number to triage need for seeing provider vs. resolving clinical matter at home</li> </ul> |
| Inadequate reimbursement for clinical providers for their medical services                                                                | <ul style="list-style-type: none"> <li>• Inadequate insurance coverage for preventative care and education</li> </ul>                                                                                 | <ul style="list-style-type: none"> <li>• Expand coverage of transition services</li> </ul>                                                                                                                                                   |

|                                                                                                                                                                                 |                                                                                                                                                                                                                |                                                                                                                                                                                                                                                                                                                                                                                                                                                                                              |
|---------------------------------------------------------------------------------------------------------------------------------------------------------------------------------|----------------------------------------------------------------------------------------------------------------------------------------------------------------------------------------------------------------|----------------------------------------------------------------------------------------------------------------------------------------------------------------------------------------------------------------------------------------------------------------------------------------------------------------------------------------------------------------------------------------------------------------------------------------------------------------------------------------------|
|                                                                                                                                                                                 |                                                                                                                                                                                                                | <ul style="list-style-type: none"> <li>• Educate providers regarding coding/billing for transition services</li> <li>• Implement funding and payment models that are flexible regarding age cut-offs and shared among pediatric and adult health services</li> <li>• Develop payment approaches to encourage collaboration between pediatric and adult care clinicians in the health care transition process</li> </ul>                                                                      |
| Inadequate financial and administrative support by institutions for their transition programs                                                                                   | <ul style="list-style-type: none"> <li>• Low prioritization of transition programs</li> <li>• Challenges in defining metrics for measurement of success in transition</li> </ul>                               | <ul style="list-style-type: none"> <li>• Improve allocation of resources by administrators</li> <li>• Improve communication of value of transition programs</li> <li>• Research on models and outcomes of transition programs.</li> </ul>                                                                                                                                                                                                                                                    |
| Inadequate integration of education system, social and recreation needs, employment considerations, community systems/supports and legal considerations with the medical system | <ul style="list-style-type: none"> <li>• Siloed operation of different systems</li> <li>• Lack of coordination between public service agencies</li> <li>• Lack of specialized social work providers</li> </ul> | <ul style="list-style-type: none"> <li>• Co-participation of pediatric and adult medical leadership, social work and others in transition program steering committees</li> <li>• Inclusion of transition process in the education system, including IEP goals</li> <li>• Integrate health care transition supports in legal discussion (eg, guardianship, power of attorney)</li> <li>• Collaboration across sectors, such as health, education and social domains, that includes</li> </ul> |

|                                                                                                                                                                                                                                                                               |                                                                                                                                                                                                                                                                                                        |                                                                                                                                                                                                                                                                                                                                                                                                                                                                                                                                                                                       |
|-------------------------------------------------------------------------------------------------------------------------------------------------------------------------------------------------------------------------------------------------------------------------------|--------------------------------------------------------------------------------------------------------------------------------------------------------------------------------------------------------------------------------------------------------------------------------------------------------|---------------------------------------------------------------------------------------------------------------------------------------------------------------------------------------------------------------------------------------------------------------------------------------------------------------------------------------------------------------------------------------------------------------------------------------------------------------------------------------------------------------------------------------------------------------------------------------|
|                                                                                                                                                                                                                                                                               |                                                                                                                                                                                                                                                                                                        | <p>integration with local government services</p> <ul style="list-style-type: none"> <li>• Train increased numbers of specialized social work providers</li> <li>• Utilization of ‘capacity building’ model for transition program</li> <li>• Increase employment options and the number of day programs for those unable to work</li> </ul>                                                                                                                                                                                                                                          |
| Inequitable access to quality pediatric to adult health care transition services                                                                                                                                                                                              | <ul style="list-style-type: none"> <li>• Poverty/income inequality</li> <li>• Discrimination based on race/ethnicity</li> <li>• Ableism/discrimination based on diagnosis</li> <li>• Maldistribution of health care resources and access related to geographic locale of the patient/family</li> </ul> | <ul style="list-style-type: none"> <li>• Equitable access of health care regardless of income/race/ethnicity/gender</li> <li>• Include equity as an outcome measure of transition programs</li> <li>• Include disability-related learning in clinical curricula, as well as in continuing education</li> <li>• Increase use of telemedicine, mobile units and incentives to work in underserved areas</li> <li>• Develop accessible health care facilities that includes input from disabled persons</li> <li>• Provide ongoing disability training to health care workers</li> </ul> |
| <p>1) It should be noted that not all of the listed barriers, their causes or the proposed interventions are universally present or applicable.</p> <p>2) Quality assurance/quality improvement processes are necessary aspects of most of the listed remediation efforts</p> |                                                                                                                                                                                                                                                                                                        |                                                                                                                                                                                                                                                                                                                                                                                                                                                                                                                                                                                       |
